# Supplementary material for: Low-temperature, solution-processed molybdenum oxide hole-collection layer for organic photovoltaics
Source: Royal Society of Chemistry journal article supplement (doi:10.1039/c2jm14911g), 2012-01-01
Supplement: c2jm14911g.pdf [file c2jm14911g.pdf]

# Low-temperature, solution-processed molybdenum oxide hole-collection layer for organic photovoltaics†

Scott R. Hammond,<sup>a,\*</sup> Jens Meyer,<sup>b</sup> N. Edwin Widjonarko,<sup>a</sup> Paul F. Ndione,<sup>a</sup> Ajaya K. Sigdel,<sup>a</sup> Andrés Garcia,<sup>a</sup> Alexander Miedaner,<sup>a</sup> Matthew T. Lloyd,<sup>a</sup> Antoine Kahn,<sup>b</sup> David S. Ginley,<sup>a</sup> Joseph J. Berry,<sup>a</sup> Dana C. Olson<sup>a</sup>

<sup>a</sup>National Center for Photovoltaics, National Renewable Energy Laboratory, Golden, CO  
USA. E-mail: scott.hammond@nrel.gov

<sup>b</sup>Department of Electrical Engineering, Princeton University, Princeton, NJ, USA.

## Electronic Supporting Information

### X-ray Diffraction (XRD)

The pale bluish-white powder obtained from the TGA of  $\text{Mo}(\text{CO})_3(\text{EtCN})_3$  in nitrogen (maximum temperature: 500 °C) was placed on a glass slide using some vacuum grease, and the XRD spectrum was measured in air (Figure S1). The XRD spectrum is consistent solely with that of crystalline  $\text{MoO}_3$ , with no signs of  $\text{MoO}_2$  crystallites or other crystalline species present. In contrast, XRD of the dark brown powder obtained from TGA of  $\text{Mo}(\text{CO})_3(\text{EtCN})_3$  in dry synthetic air (maximum temperature: 300 °C) showed no peaks whatsoever, indicative of an amorphous morphology.

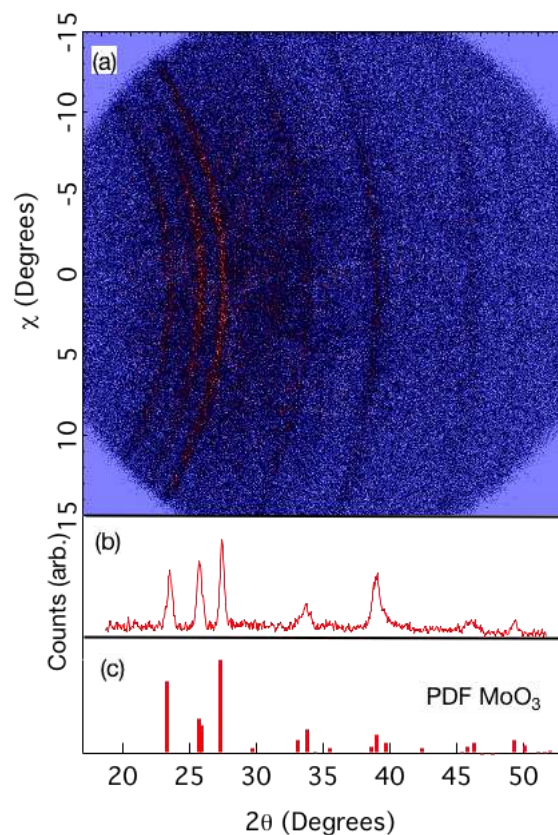

**Figure S1.** (a) 2D XRD raw image and (b)  $2\theta$  obtained by integrating spectrum in  $\chi$  direction for the sample obtained from TGA of  $\text{Mo}(\text{CO})_3(\text{EtCN})_3$  in nitrogen, with (c) reference powder diffraction file (PDF)  $\text{MoO}_3$  peak positions

### Variable angle spectroscopic ellipsometry (VASE)

VASE of  $\text{MoO}_x$  thin films coated on Eagle 2000 glass was performed to determine the film thickness, along with the optical constants (Figure S2). For  $\text{MoO}_x$  films deposited using the optimized conditions, with an anneal temperature of 120 °C and a 2 minute  $\text{O}_2$ -plasma treatment, the thickness was determined to be 4.9 nm, which is comparable to that generally used for thermally evaporated  $\text{MoO}_3$  HCL layers.<sup>1-3</sup>

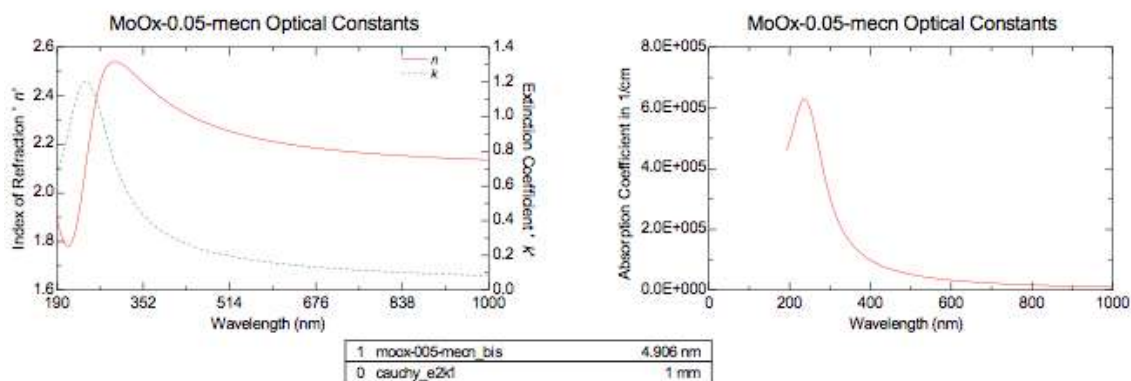

**Figure S2.** VASE determined optical constants and thickness of MoO<sub>x</sub> thin film on Eagle 2000 glass substrate

### Atomic Force Microscopy (AFM)

AFM was performed on cleaned, patterned ITO-coated glass substrates before and after coating with MoO<sub>x</sub> following the optimized recipe (Figure S3). The root-mean-squared surface roughness ( $R_{\text{rms}}$ ) values before and after coating, 3.79 nm and 3.67 nm, respectively, are nearly identical, suggesting a smooth and conformal coating that is consistent with an amorphous morphology.

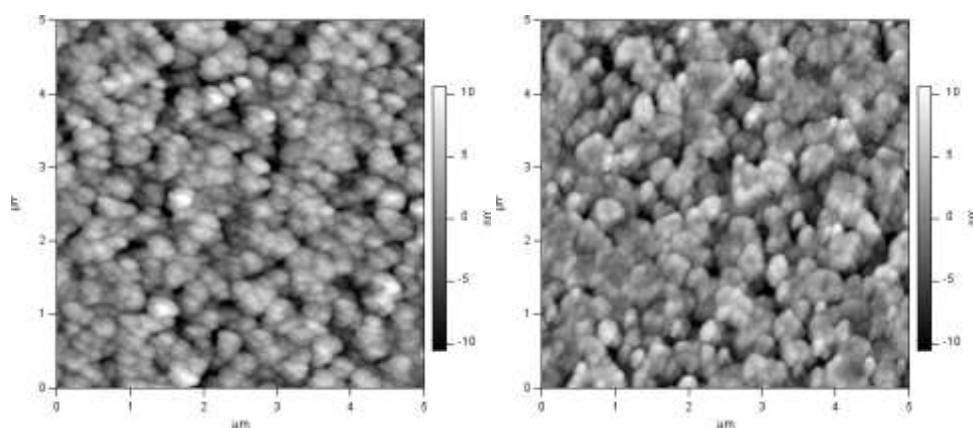

**Figure S3.** AFM of cleaned patterned ITO-coated glass before (left) and after (right) coating with MoO<sub>x</sub> following the optimized recipe

## OPV Device Optimization

The MoO<sub>x</sub> HCL shows a wide processing window. We examined the effect of MoO<sub>x</sub> annealing temperature, from 100 to 140 °C, on the performance of the HCL in conventional architecture P3HT:PCBM devices (Figure S4). Within this annealing range, the HCL performance remained identical, with devices yielding comparable power conversion efficiencies. We also explored the effect of different O<sub>2</sub> plasma durations (Figure S5). Varying the duration of the plasma treatment from 0.5-5 min appears to have minimal effect on the device performance. In contrast, varying the solution concentration and spin speed, and thus the film thickness, has a much greater effect on device performance (Figure S6). As MoO<sub>x</sub> is quite resistive, the HCL thickness should be minimized to limit resistive losses. The film needs to be thick enough to form continuous films, however, in order to prevent large leakage currents (e.g. Figure S5: 0.05 M, 8000 rpm). The optimal performance was obtained from the 0.05 M solution, spun at 6000 rpm, which yields a thickness of ~5 nm, as determined by VASE, as described above.

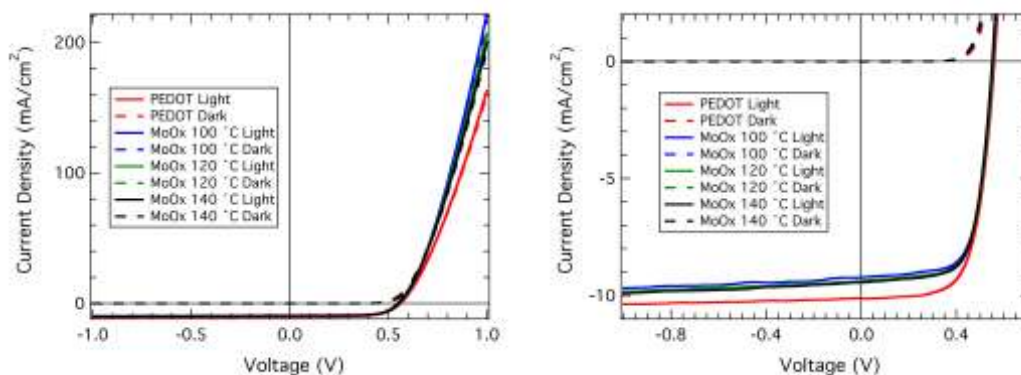

**Figure S4.** Representative *J-V* traces demonstrating the effect of MoO<sub>x</sub> HCL thermal annealing on P3HT:PCBM BHJ device performance

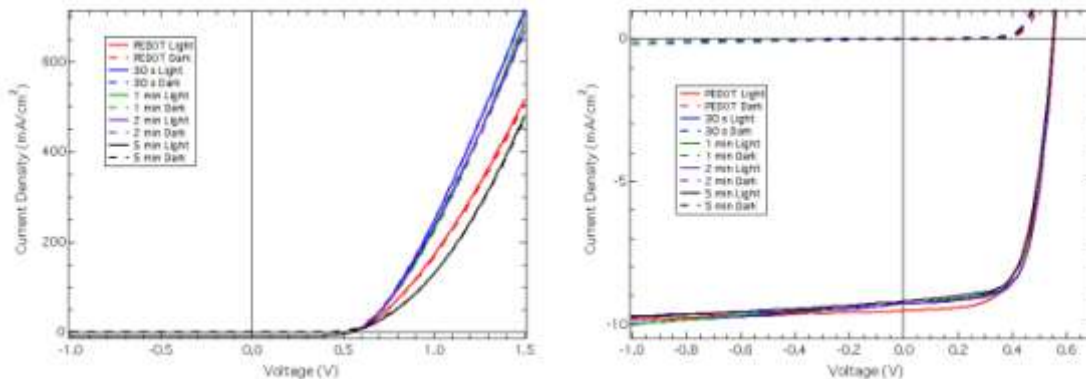

**Figure S5.** Representative  $J$ - $V$  traces demonstrating the effect of  $\text{MoO}_x$  HCL  $\text{O}_2$ -plasma duration on P3HT:PCBM BHJ device performance

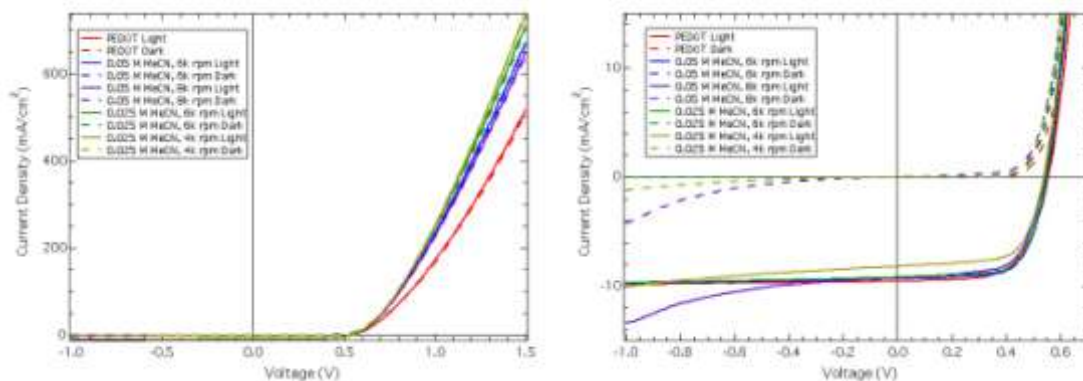

**Figure S6.** Representative  $J$ - $V$  traces demonstrating the effect of  $\text{Mo}(\text{CO})_3(\text{EtCN})_3$  solution concentration and spin speed on P3HT:PCBM BHJ device performance

## References

1. V. Shrotriya, G. Li, Y. Yao, C.-W. Chu and Y. Yang, *Appl. Phys. Lett.*, 2006, 88, 073508.
2. F. Liu, S. Shao, X. Guo, Y. Zhao and Z. Xie, *Sol. Energy Mater. Sol. Cells*, 2010, 94, 842-845.
3. Y. Sun, C. J. Takacs, S. R. Cowan, J. H. Seo, X. Gong, A. Roy and A. J. Heeger, *Adv. Mater. (Weinheim, Ger.)*, 2011, 23, 2226-2230.
